# Supplementary material for: Recombination analysis of Soybean mosaic virus sequences reveals evidence of RNA recombination between distinct pathotypes
Source: PubMed Central journal article supplement (PMC2627826; doi:10.1186/1743-422x-5-143), 2008-11-26
Supplement: 1743-422X-5-143-S1.pdf [file 1743-422X-5-143-S1.pdf]

**GenBank accession numbers for P1 sequences:**

|          |          |          |          |          |          |
|----------|----------|----------|----------|----------|----------|
| AJ639655 | AJ639654 | AJ639653 | AJ639652 | AJ639651 | AJ639650 |
| AJ639649 | AJ639648 | AJ639647 | AJ639646 | AJ558194 | AJ290450 |
| AJ628762 | AJ628761 | AJ628760 | AJ628759 | AJ628758 | AB085899 |
| AF200582 | AF200579 | AF200576 | AF200570 | AF200567 | AF200564 |
| AF200561 | AF200558 | AF200555 | AF200550 | AF200547 | AF200544 |
| AF200541 | AF200538 | AF200535 |          |          |          |

**GenBank accession numbers for CP sequences:**

|          |          |          |          |          |          |
|----------|----------|----------|----------|----------|----------|
| X96665   | X63771   | AB206834 | AB206833 | AB206832 | AB206831 |
| AB206830 | AB206829 | AB206828 | AB206827 | DQ517432 | DQ517431 |
| DQ517430 | DQ517429 | DQ517428 | DQ517427 | E01309   | AB18149  |
| AB181492 | AY799852 | AJ609298 | AY216489 | AY216487 | AY216485 |
| AY216483 | AY216481 | AY216479 | AB100448 | AB100447 | AB100446 |
| AB100445 | AB100444 | AB085900 | AF200584 | AF200581 | AF200578 |
| AF200572 | AF200569 | AF200566 | AF200563 | AF200560 | AF200557 |
| AF200554 | AF200552 | AF200549 | AF200546 | AF200543 | AF200540 |
| AF200537 | D88616   | D88615   |          |          |          |

**Full-length sequences analyzed for recombination:**

|                           |                                          |
|---------------------------|------------------------------------------|
| L [GenBank: EU871724]     | L-RB [GenBank: EU871725]                 |
| G2 [GenBank: S42280.1]    | N [GenBank: D00507.2]                    |
| Aa [GenBank: AB100442.1]  | Aa15-M2 [GenBank: AB100443.1]            |
| G5 [GenBank: AY294044.1]  | G7 referred as G7f [GenBank: AF241739.1] |
| G7d [GenBank: AY216987.1] | G7 referred as G7x [GenBank: AY216010.1] |
| G7H [GenBank: AY294045.1] | CN18 [GenBank: AJ619757]                 |
| HH5 [GenBank: AJ310200]   | HZ [GenBank: AJ312439]                   |
