# Supplementary material for: Recombination analysis of Soybean mosaic virus sequences reveals evidence of RNA recombination between distinct pathotypes
Source: PubMed Central journal article supplement (PMC2627826; doi:10.1186/1743-422x-5-143), 2008-11-26
Supplement: 1743-422X-5-143-S2.pdf [file 1743-422X-5-143-S2.pdf]

**Summary of unique recombination events identified by the Recombination Detection Program v.3.31 (RDP3)**

RDP, GENECONV, Bootscan, Maxchi, Chimera, and SiScan, implemented in RDP3, were used for the automated scanning of SMV sequence alignments.

**I. Results summary for P1 sequence alignment recombination analysis.**

Isolates are identified by their respective Genbank accession numbers (please see Additional file 1 for the list of all analyzed isolates).

| Event number | Breakpoint position in recombinant sequence |     | Recombinant Sequence(s)          | Parental sequence(s)             |                                                                                              | Detection methods implemented in RDP3 (see RDP3 reference for details) |          |          |          |          |          |
|--------------|---------------------------------------------|-----|----------------------------------|----------------------------------|----------------------------------------------------------------------------------------------|------------------------------------------------------------------------|----------|----------|----------|----------|----------|
|              | Begin                                       | End |                                  | Minor                            | Major                                                                                        | RDP                                                                    | GENECONV | Bootscan | Maxchi   | Chimaera | SiScan   |
| 1 (1)        | 23*                                         | 351 | AJ628758                         | AJ628759<br>AJ628761<br>AJ628760 | AJ628762                                                                                     | 2.00E-07                                                               | 4.11E-05 | 1.05E-04 | 8.38E-08 | 6.91E-09 | 1.24E-16 |
| 2 (2)        | 156                                         | 334 | AF200538<br>AF200555<br>AF200544 | AF200535                         | AJ639654<br>AJ639653<br>AJ639651<br>AJ639647<br>AJ558194<br>AF200567<br>AF200564<br>AF200561 | NS                                                                     | NS       | NS       | NS       | NS       | 2.39E-05 |
| 3 (3)        | 547                                         | 727 | AF200535<br>AF200541             | AF200550                         | AF200567<br>AJ639653<br>AJ639647<br>AF200564                                                 | NS                                                                     | NS       | NS       | NS       | NS       | 1.44E-03 |

\* = The actual breakpoint position is undetermined (it was most likely overprinted by a subsequent recombination event).

Minor Parent = Parent contributing the smaller fraction of sequence.

Major Parent = Parent contributing the larger fraction of sequence.

Unknown = Only one parent and a recombinant need be in the alignment for a recombination event to be detectable.

The sequence listed as unknown was used to infer the existence of a missing parental sequence.

NS = No significant P-value was recorded for this event using this method.

**II. Results summary for CP sequence alignment recombination analysis.**

Isolates are identified by their respective Genbank accession numbers (please see Additional file 1 for the list of all analyzed isolates).

| Event number | Breakpoint position in recombinant sequence |       | Recombinant Sequence(s) | Parental sequence(s)                                                                                                             |                                                                                                                                                                                                                                                                  | Detection methods implemented in RDP3 (see RDP3 reference for details) |          |          |          |          |          |
|--------------|---------------------------------------------|-------|-------------------------|----------------------------------------------------------------------------------------------------------------------------------|------------------------------------------------------------------------------------------------------------------------------------------------------------------------------------------------------------------------------------------------------------------|------------------------------------------------------------------------|----------|----------|----------|----------|----------|
|              | Begin                                       | End   |                         | Minor                                                                                                                            | Major                                                                                                                                                                                                                                                            | RDP                                                                    | GENECONV | Bootscan | Maxchi   | Chimaera | SiScan   |
| 1 (5)        | 2048                                        | 2603* | X96665                  | DQ517429<br>DQ517432<br>DQ517427<br>AY216485<br>AY216481<br>AF200584<br>AF200557<br>AF200552<br>AF200546<br>AF200540<br>AF200537 | AY216483<br>X63771<br>DQ517431<br>DQ517430<br>DQ517428<br>AY216489<br>AY216487<br>AY216479<br>AB100448<br>AB100447<br>AB100445<br>AB100444<br>AB085900<br>AF200581<br>AF200578<br>AF200572<br>AF200563<br>AF200560<br>AF200554<br>AF200549<br>AF200543<br>D88615 | 4.08E-04                                                               | 6.06E-03 | 1.76E-04 | 3.38E-05 | 5.17E-04 | 5.35E-09 |
| 2 (8)        | 101                                         | 414   | AB206827                | DQ517429                                                                                                                         | AB181493                                                                                                                                                                                                                                                         | NS                                                                     | NS       | NS       | NS       | NS       | 8.90E-04 |

|        |     |      |                                                                                                                                                                        |                                                  |                                                                                                              |    |    |    |          |          |          |
|--------|-----|------|------------------------------------------------------------------------------------------------------------------------------------------------------------------------|--------------------------------------------------|--------------------------------------------------------------------------------------------------------------|----|----|----|----------|----------|----------|
| 3 (9)  | 84  | 599  | AB206829<br>AB206828<br>AB100446<br>D88616<br><br>AF200566<br>AB206834<br>AB206833<br>AB206832<br>AB206831<br>AB206830<br>AB181493<br>AY799852<br>AJ609298<br>AF200569 | AF200537<br><br>AF200563<br>AY216487<br>AY216483 | AB206834<br>AB206833<br>AB206832<br>AB206831<br>AB206830<br>AJ609298<br><br>AY216481<br>AY216485<br>AF200584 | NS | NS | NS | 3.42E-05 | 2.56E-03 | 4.86E-04 |
| 4 (10) | 541 | 795* | AB100444                                                                                                                                                               | AB181492                                         | AB100447                                                                                                     | NS | NS | NS | NS       | 9.73E-03 | NS       |

\* = The actual breakpoint position is undetermined (it was most likely overprinted by a subsequent recombination event).

Minor Parent = Parent contributing the smaller fraction of sequence.

Major Parent = Parent contributing the larger fraction of sequence.

Unknown = Only one parent and a recombinant need be in the alignment for a recombination event to be detectable.

The sequence listed as unknown was used to infer the existence of a missing parental sequence.

NS = No significant P-value was recorded for this event using this method.

### III. Results summary for the recombination analysis of of full-length sequence alignment.

Isolates are identified by their names, as used throughout the manuscript (please see Additional file 1 for accession numbers and the list of all analyzed isolates).

| Event number | Breakpoint position in recombinant sequence |               | Recombinant Sequence(s) | Parental sequence(s)                              |                                          | Identified in RDP3 (see RDP3 reference for details) |          |          |          |          |          |
|--------------|---------------------------------------------|---------------|-------------------------|---------------------------------------------------|------------------------------------------|-----------------------------------------------------|----------|----------|----------|----------|----------|
|              | Begin                                       | End           |                         | Minor                                             | Major                                    | SDP                                                 | GENECONV | Bootscan | Maxchi   | Chimaera | SiScan   |
| 1 (1)        | 6959                                        | 9335          | HZ<br>HH5               | Unknown (CN18)                                    | L<br>G7H<br>G2<br>G5<br>N<br>L-RB        | 9.57E-42                                            | 5.34E-43 | 1.02E-47 | 9.79E-23 | 2.94E-21 | 1.61E-19 |
| 2 (2)        | 4297 ('w', #)                               | 5484 ('x')    | G5<br>HH5<br>HZ         | G7d<br>G7f<br>Aa<br>Aa15-M2<br>G7x                | G7H<br>G2<br>N<br>HH5<br>HZ<br>L<br>L-RB | 4.81E-33                                            | 6.90E-10 | 4.72E-32 | 5.25E-15 | 1.51E-16 | 2.93E-12 |
| 3 (3)        | 5581* ('y')                                 | 6351 ('z', #) | G7H<br>HH5<br>HZ        | CN18<br>G7f<br>Aa<br>Aa15-M2<br>G7d<br>G7x<br>HH5 | G5<br>G2<br>N<br>L<br>L-RB               | 1.82E-25                                            | 4.35E-17 | 1.14E-24 | 1.58E-12 | 2.34E-12 | 3.63E-16 |
| 4 (4)        | 6972                                        | 9350          | CN18                    | L<br>G7H<br>G2<br>G5<br>N<br>L-RB                 | Aa<br>G7f<br>Aa15-M2<br>G7d<br>G7x       | 7.21E-22                                            | 1.99E-09 | 1.19E-17 | 1.79E-13 | 3.49E-15 | 7.90E-18 |
| 5 (5)        | 3148                                        | 4290          | CN18                    | Aa<br>G7f                                         | HH5                                      | 8.47E-14                                            | 1.09E-06 | 1.51E-13 | 5.21E-13 | 8.63E-10 | 6.68E-17 |

|                |                    |                   |                                                       |                                                                                                                                                                                         |                                                           |          |          |          |          |          |          |
|----------------|--------------------|-------------------|-------------------------------------------------------|-----------------------------------------------------------------------------------------------------------------------------------------------------------------------------------------|-----------------------------------------------------------|----------|----------|----------|----------|----------|----------|
| 6 (6)          | 0*                 | 109               | CN18                                                  | Aa15-M2<br>G7d<br>G7x<br><br>Unknown (G5)<br>Unknown(G7H)<br>Unknown(G2)<br>Unknown(N)<br>Unknown(Aa)<br>Unknown(Aa15-M2)<br>Unknown(HH5)<br>Unknown(HZ)<br>Unknown(L)<br>Unknown(L-RB) | G7d<br>G7f<br>Aa<br>Aa15-M2<br>G7x                        | 4.49E-10 | 3.86E-13 | 2.23E-07 | 1.14E-03 | 1.02E-02 | NS       |
| 7 (7)          | 47*                | 2681              | Aa<br>Aa15-M2                                         | L<br>G7H<br>G2<br>G5<br>N<br>HH5<br>HZ<br>L-RB                                                                                                                                          | G7d<br>G7f<br>G7x                                         | 1.46E-07 | NS       | NS       | 4.46E-10 | 7.31E-11 | 6.16E-21 |
| 8 (8)          | 4862               | 5468*             | HH5<br>G5<br>G7f<br>Aa<br>Aa15-M2<br>G7d<br>G7x<br>HZ | CN18<br>G5<br>Aa15-M2                                                                                                                                                                   | G7H<br>G2<br>N<br>L<br>L-RB                               | 1.30E-04 | 7.93E-05 | 1.53E-09 | 2.97E-09 | 7.77E-10 | 1.77E-10 |
| 9 (9)          | 5554*              | 6971*             | CN18<br>HH5<br>HZ                                     | G7d<br>G7f<br>Aa<br>Aa15-M2<br>G7x                                                                                                                                                      | N<br>G7H<br>G2<br>L<br>L-RB                               | 6.32E-11 | 6.52E-07 | 8.99E-05 | 2.41E-08 | 7.48E-08 | 3.74E-10 |
| 10 (10)        | 163*               | 3147*             | CN18                                                  | G7H                                                                                                                                                                                     | Unknown (L)<br>Unknown(G2)<br>Unknown(N)<br>Unknown(L-RB) | NS       | NS       | 2.78E-02 | 7.52E-10 | 1.17E-06 | 3.03E-09 |
| <b>11 (11)</b> | <b>8852 ('e')</b>  | <b>9021 ('f')</b> | <b>G7f</b>                                            | N<br>G2<br>L<br>L-RB                                                                                                                                                                    | G7x<br>Aa<br>Aa15-M2<br>G7d                               | NS       | 1.40E-06 | 1.26E-07 | NS       | NS       | NS       |
| 12 (12)        | 4933*              | 4951*             | G2                                                    | Unknown (CN18)<br>Unknown(G7f)<br>Unknown(Aa)<br>Unknown(Aa15-M2)<br>Unknown(G7d)<br>Unknown(G7x)                                                                                       | L<br>G7H<br>N<br>L-RB                                     | NS       | 3.93E-07 | NS       | NS       | NS       | NS       |
| 13 (13)        | 9342*              | 25*               | HH5<br>HZ                                             | Unknown (Aa)<br>Unknown(Aa15-M2)                                                                                                                                                        | N<br>G2<br>G5<br>L<br>L-RB                                | 1.99E-02 | NS       | 4.52E-04 | 5.16E-03 | 7.62E-03 | NS       |
| <b>14 (14)</b> | <b>5108* ('a')</b> | <b>5258 ('b')</b> | <b>G7f</b>                                            | G2<br>G7H                                                                                                                                                                               | G7x<br>Aa                                                 | NS       | 4.75E-04 | 2.91E-03 | 3.40E-03 | 3.34E-03 | NS       |

|                |                   |                   |                             |                                    |                             |          |          |          |    |    |          |
|----------------|-------------------|-------------------|-----------------------------|------------------------------------|-----------------------------|----------|----------|----------|----|----|----------|
| <b>15 (15)</b> | <b>6024 ('c')</b> | <b>6147 ('d')</b> | <b>G7f</b>                  | N<br>L<br>L-RB                     | Aa15-M2<br>G7d              |          |          |          |    |    |          |
| 16 (16)        | 4012              | 4097              | G2                          | N<br>G2<br>L<br>L-RB               | G7x<br>Aa<br>Aa15-M2<br>G7d | NS       | 9.27E-03 | 1.44E-03 | NS | NS | NS       |
| 17 (17)        | 4296*             | 4481              | G7H<br>G2<br>N<br>L<br>L-RB | G7d<br>G7f<br>Aa<br>Aa15-M2<br>G7x | N<br>L                      | NS       | 3.41E-03 | NS       | NS | NS | NS       |
|                |                   |                   |                             | Unknown (CN18)                     | Aa15-M2<br>Aa               | 3.77E-02 | NS       | 1.60E-02 | NS | NS | 2.86E-03 |

\* = The actual breakpoint position is undetermined (it was most likely overprinted by a subsequent recombination event).

Minor Parent = Parent contributing the smaller fraction of sequence.

Major Parent = Parent contributing the larger fraction of sequence.

Unknown = Only one parent and a recombinant need be in the alignment for a recombination event to be detectable.

The sequence listed as unknown was used to infer the existence of a missing parental sequence.

NS = No significant P-value was recorded for this event using this method.

#### Notes on manual verification of recombination events in full length sequences:

Manually verified recombination events are shown in bold font (events 2, 3, 11, 14, 15)

Notation, used in the manuscript, for the recombination sites identified manually is indicated within brackets for each recombination event.

# = small disagreement between the location of recombination site found manually and by RDP3.

Analysis of specific sites supporting recombination events supported the recombination event positions determined in manual analyses.

The RDP listed all potential parental and recombinant sequences (i.e. all sequences in which recombination signature was apparent). The most likely pattern of recombination, including the most likely parental isolates or isolate groups, was detected by manual recombination analysis. This analysis also took into consideration the histories of the isolates in determining the identities of parental sequences. For instance, the same informative sites supported G2 and N as the minor parent of G7f between its recombination sites. However, because sequencing of isolates G2 and G7f was reported at the same time and the isolates at some point may have come into contact, we proposed G2 as the minor parent of G7f. However, isolate N was also a possible parent. Conclusions about parental isolate identities thus often apply to the origin of the sequence fragments on the level of isolate groups. Precise identification of the parental isolate sequences requires additional information than what was available for our analysis and a controlled environment where only certain isolates are allowed to come into contact, which is not what usually occurs in the field.
