# Supplementary material for: Recombination analysis of Soybean mosaic virus sequences reveals evidence of RNA recombination between distinct pathotypes
Source: PubMed Central journal article supplement (PMC2627826; doi:10.1186/1743-422x-5-143), 2008-11-26

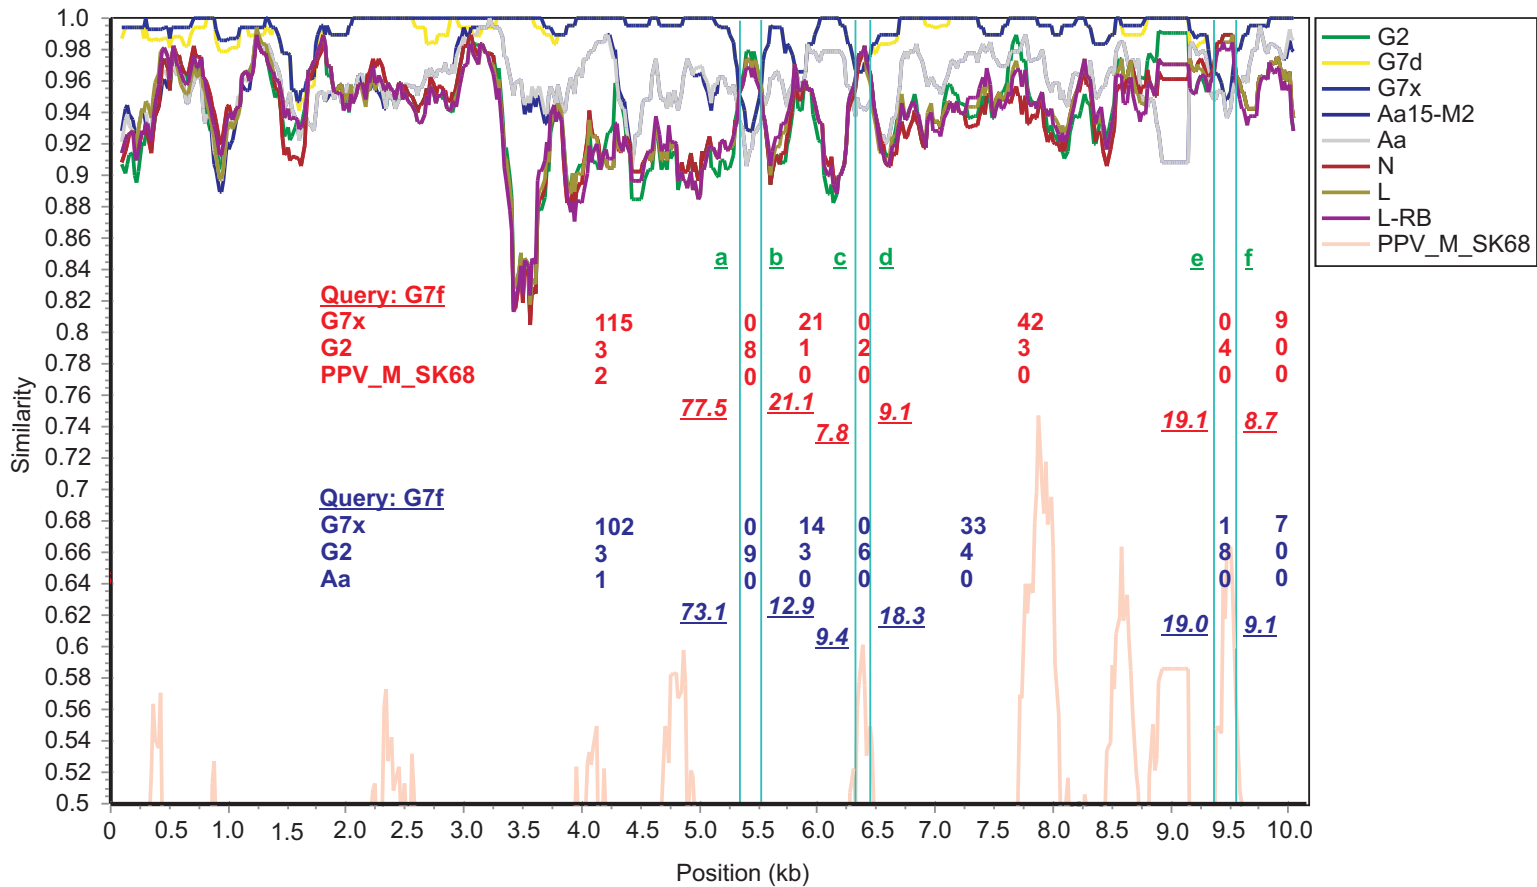

Supplement: 1743-422X-5-143-S3.pdf [file 1743-422X-5-143-S3.pdf]
