# Supplementary material for: Recombination analysis of Soybean mosaic virus sequences reveals evidence of RNA recombination between distinct pathotypes
Source: PubMed Central journal article supplement (PMC2627826; doi:10.1186/1743-422x-5-143), 2008-11-26
Supplement: 1743-422X-5-143-S6.pdf [file 1743-422X-5-143-S6.pdf]

| #  | Nucleotide position # |          | G7f / G2   |            | G7x        |            |
|----|-----------------------|----------|------------|------------|------------|------------|
|    | In G7f                | In codon | codon      | aa         | codon      | aa         |
| 1  | 5114                  | 3        | GGA        | Gly        | GGC        | Gly        |
| 2  | 5129                  | 3        | TTG        | Leu        | TTA        | Leu        |
| 3  | 5177                  | 3        | <i>GGG</i> | <i>Gly</i> | <i>GGA</i> | <i>Gly</i> |
| 4  | 5180                  | 3        | <i>TTC</i> | <i>Phe</i> | <i>TTT</i> | <i>Phe</i> |
| 5  | 5187                  | 1        | <i>GTC</i> | <i>Val</i> | <i>ATC</i> | <i>Ile</i> |
| 6  | 5189                  | 3        | GTC        | Val        | GTT        | Val        |
| 7  | 5191                  | 2        | AAG        | Lys        | AGG        | Arg        |
| 8  | 5234                  | 3        | <i>GAC</i> | <i>Asp</i> | <i>GAT</i> | <i>Asp</i> |
| 9  | 6104                  | 3        | <i>GAC</i> | <i>Asp</i> | <i>GAT</i> | <i>Asp</i> |
| 10 | 6113                  | 3        | <i>CCG</i> | <i>Pro</i> | <i>CCA</i> | <i>Pro</i> |
| 11 | 8876                  | 3        | <i>GTA</i> | <i>Val</i> | <i>GTT</i> | <i>Val</i> |
| 12 | 8909                  | 3        | <i>GCT</i> | <i>Ala</i> | <i>GCC</i> | <i>Ala</i> |
| 13 | 8945                  | 3        | CAG        | Gln        | CAA        | Gln        |
| 14 | 8963                  | 3        | AAA        | Lys        | AAG        | Lys        |
